# Supplementary material for: Selective S Cone Damage and Retinal Remodeling Following Intense Ultrashort Pulse Laser Exposures in the Near-Infrared
Source: PubMed Central journal article supplement — Invest Ophthalmol Vis Sci. 2018 Dec;59(15):5973–84. doi: 10.1167/iovs.18-25383 (PMC6298064; doi:10.1167/iovs.18-25383), 2018-12
Supplement: iovs-59-13-49_s04.pdf [file iovs-59-13-49_s04.pdf]

## Supplementary figures

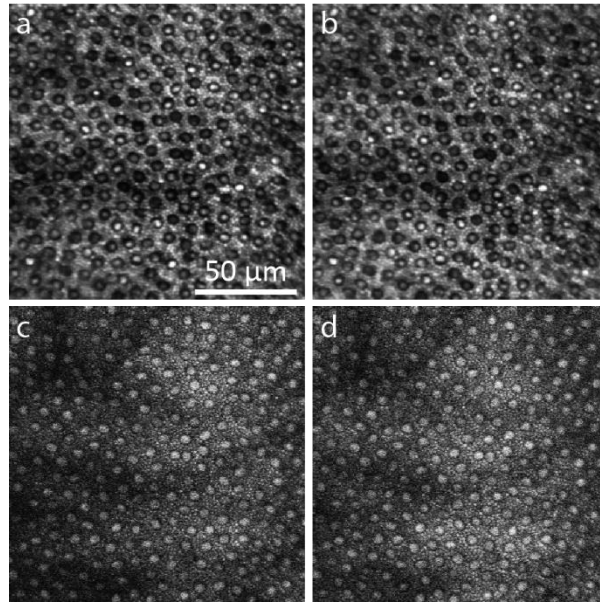

Fig. S1: Representative reflectance (a, b) and TPEF (c, d) images of a peripheral retinal location during the first exposure to  $489 \text{ J/cm}^2$  (a, c) and the immediate follow-up (b, d). For exposure to  $489 \text{ J/cm}^2$ , no structural or functional changes were observed

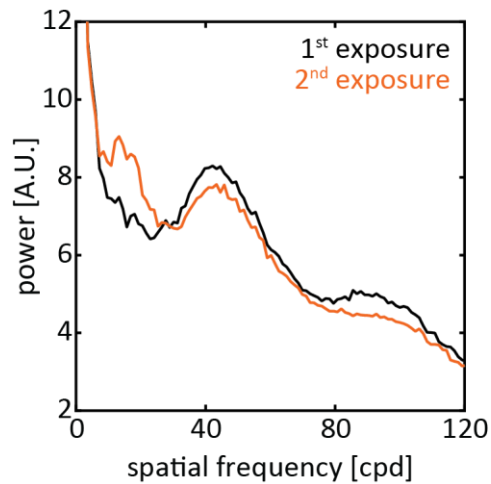

Fig. S4: Spatial frequency amplitude spectrum of photoreceptor images shown in Figure 3c (1<sup>st</sup> exposure) and d (2<sup>nd</sup> exposure). The additional peak at a spatial frequency of  $\sim 13$  cpd agrees with the frequency of S cones at a retinal eccentricity of  $\sim 2^\circ$  in macaca fascicularis.

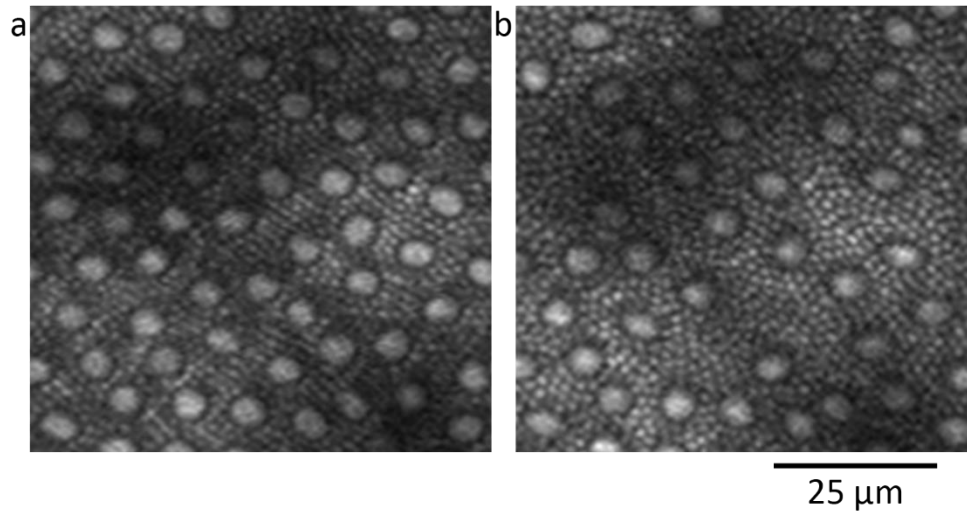

Fig. S5: TPEF image of a retinal location during the first exposure to  $856 \text{ J/cm}^2$  (a) and after many exposures of the same kind (b). 18 of 62 cones disappeared as a consequence of the repeated exposure. Two individual observers performed rod counts on these images.

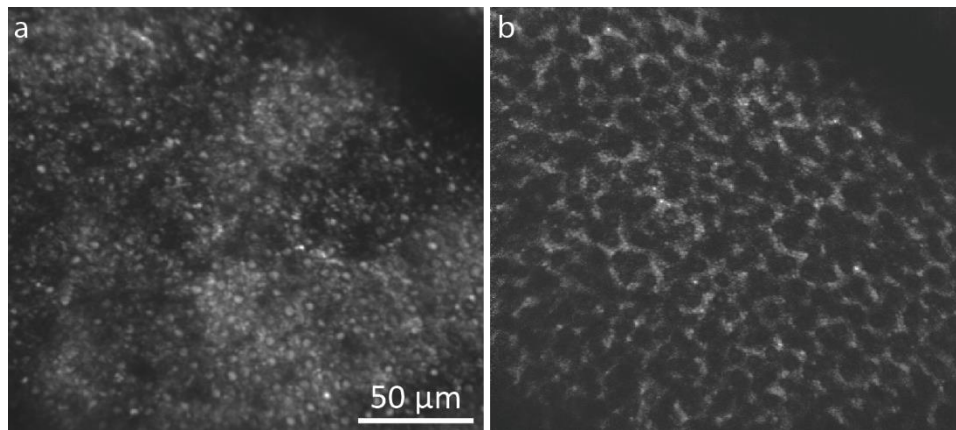

Fig. S7: Reflectance image of the photoreceptor layer (a) at a retinal location where S cone damage was observed and TPEF image of the underlying RPE (b). Dark regions in the upper right of the fluorescence image are related to retinal vessels. Here the illumination wavelength was 900 nm to collect two-photon excited fluorescence from lipofuscin between 400 and 680 nm.
